# Supplementary material for: Superhydrophobic MOFs decorated on hierarchically micro/nanofibrous membranes for high-performance emulsified oily wastewater separation and cationic dyes adsorption
Source: Royal Society of Chemistry journal article supplement (doi:10.1039/d1ta04982h), 2021-11-23
Supplement: d1ta04982h1.pdf [file d1ta04982h1.pdf]

## Supporting Information

### Superhydrophobic MOFs decorated on hierarchically micro/nanofibrous membranes for high-performance emulsified oily wastewater separation and cationic dyes adsorption

Ting Ying, Jiafei Su, Yijing Jiang, Lingyu Ni, Qinfei Ke\* and He Xu\*

*College of Chemical and Materials Sciences, Shanghai Normal University, No. 100*

*Guilin Road, Shanghai 200234, China.*

\* Corresponding author:

Dr. Qinfei Ke (E-mail: [kqf@shnu.edu.cn](mailto:kqf@shnu.edu.cn))

Dr. He Xu (E-mail: [xuhe@shnu.edu.cn](mailto:xuhe@shnu.edu.cn))

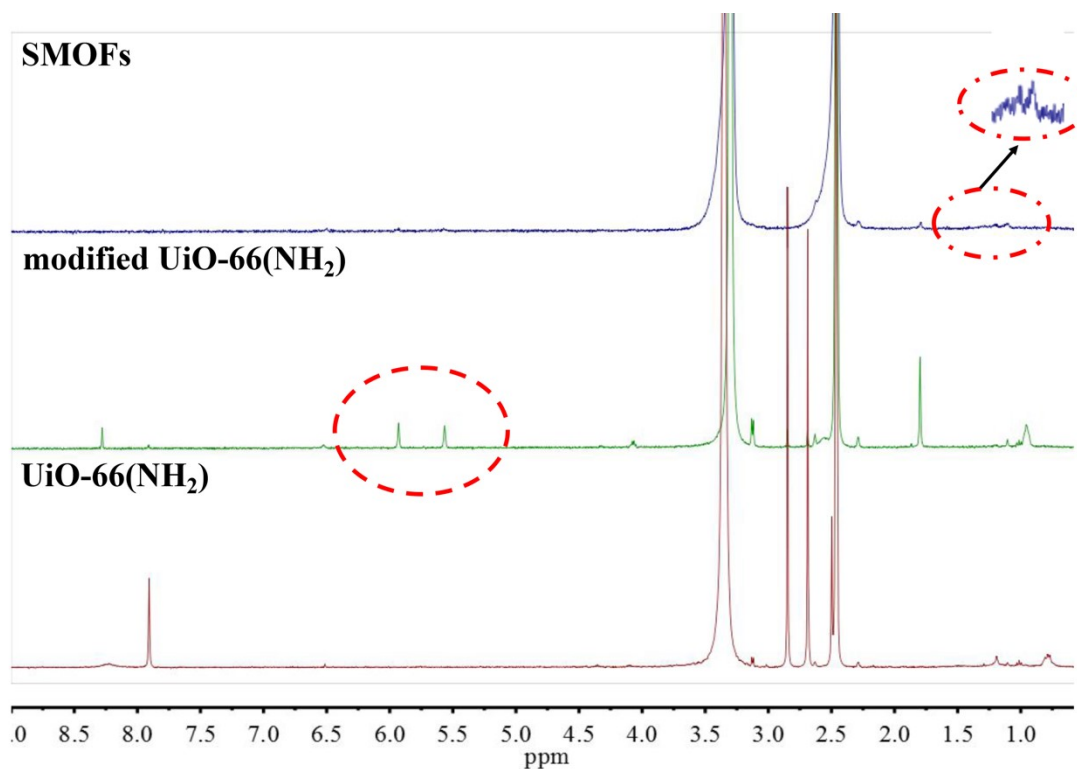

**Fig.S1.**  $^1\text{H}$  NMR (in  $\text{CDCl}_3$ ) spectrum of UiO-66( $\text{NH}_2$ ), modified UiO-66( $\text{NH}_2$ ) and SMOFs.

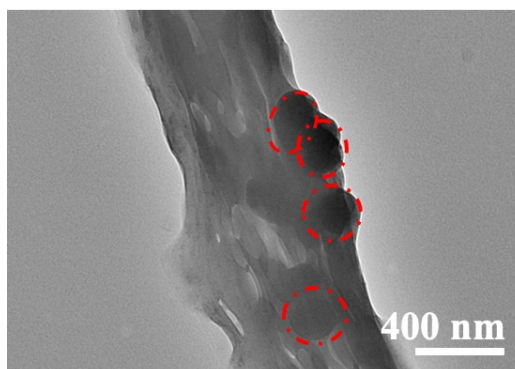

**Fig.S2.** TEM images of the fibers of SMOFs@PT in high magnification.

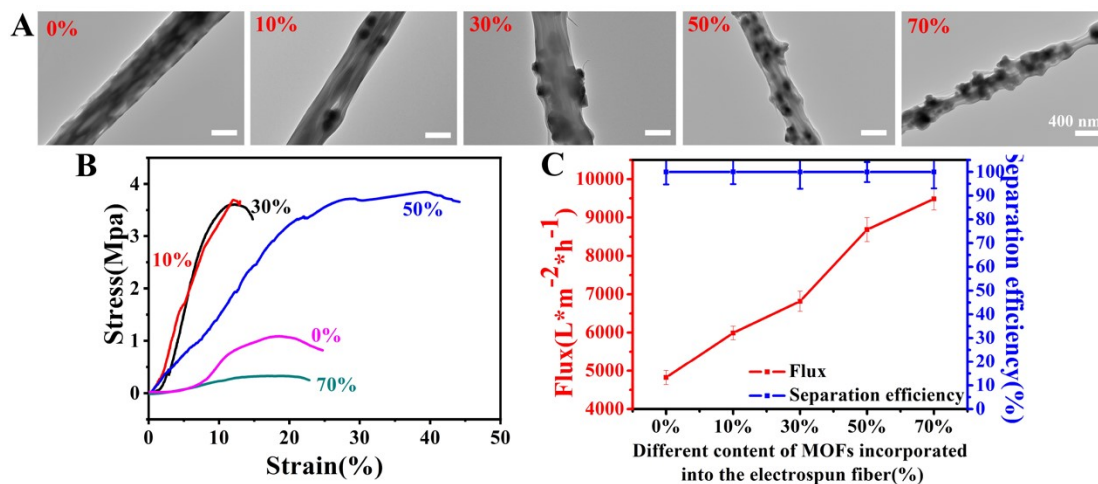

**Fig S3.** (A) TEM images of the composite membranes with different content of MOFs incorporated (0%, 10%, 30%, 50%, and 70%). (B) The tensile stress-strain curves of the electrospun membranes incorporated with different content of MOFs (0%, 10%, 30%, 50%, and 70%). (C) Separation efficiency and flux of the composite membranes with different content of MOFs incorporated (0%, 10%, 30%, 50%, and 70%).

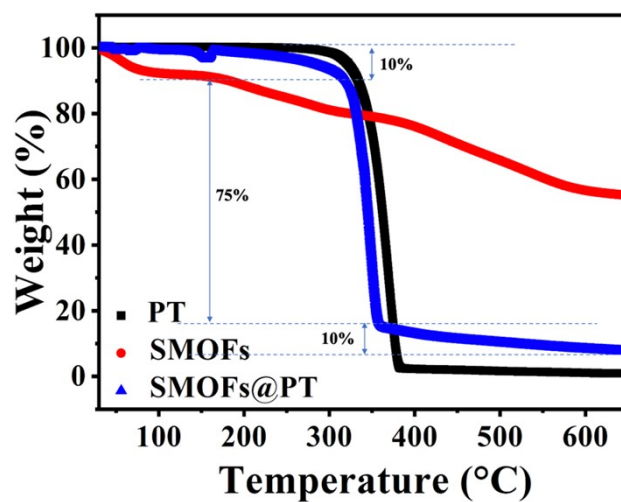

**Fig S4.** TGA curves of the as-prepared electrospun membranes (PT, SMOFs and SMOFs@PT)

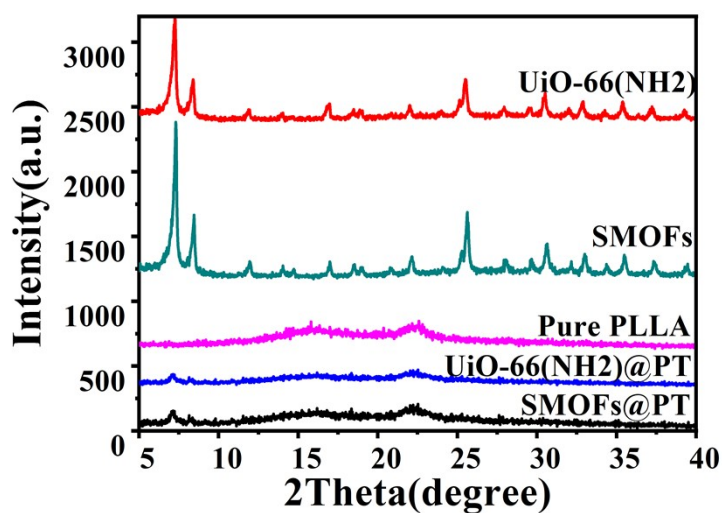

**Fig.S5.** X-ray diffraction spectrum of the UiO-66(NH<sub>2</sub>), SMOFs nanoparticles, the pure PLLA, UiO-66(NH<sub>2</sub>)@PT and SMOFs@PT electrospun membranes.

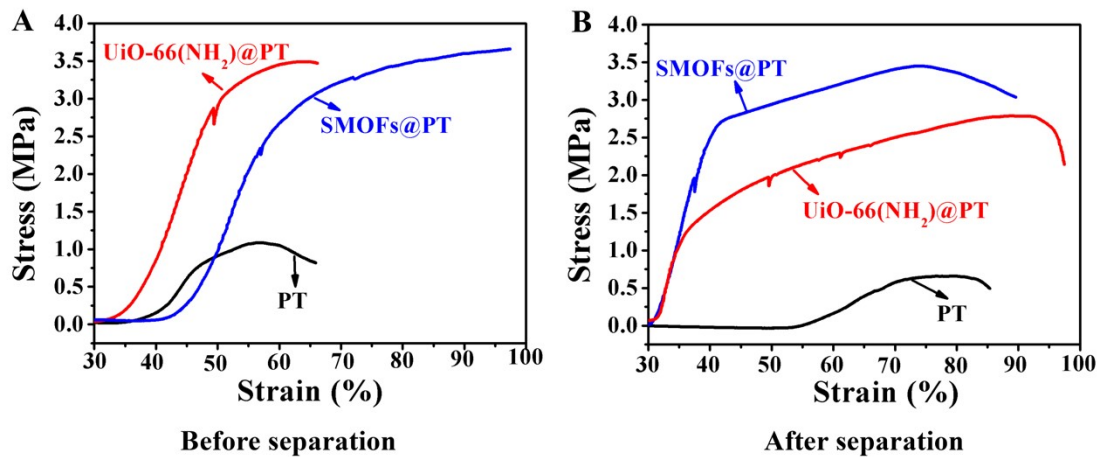

**Fig.S6** Stress-strain curve of the PT, UiO-66(NH<sub>2</sub>)@PT and SMOFs@PT before and after oil-water separation.

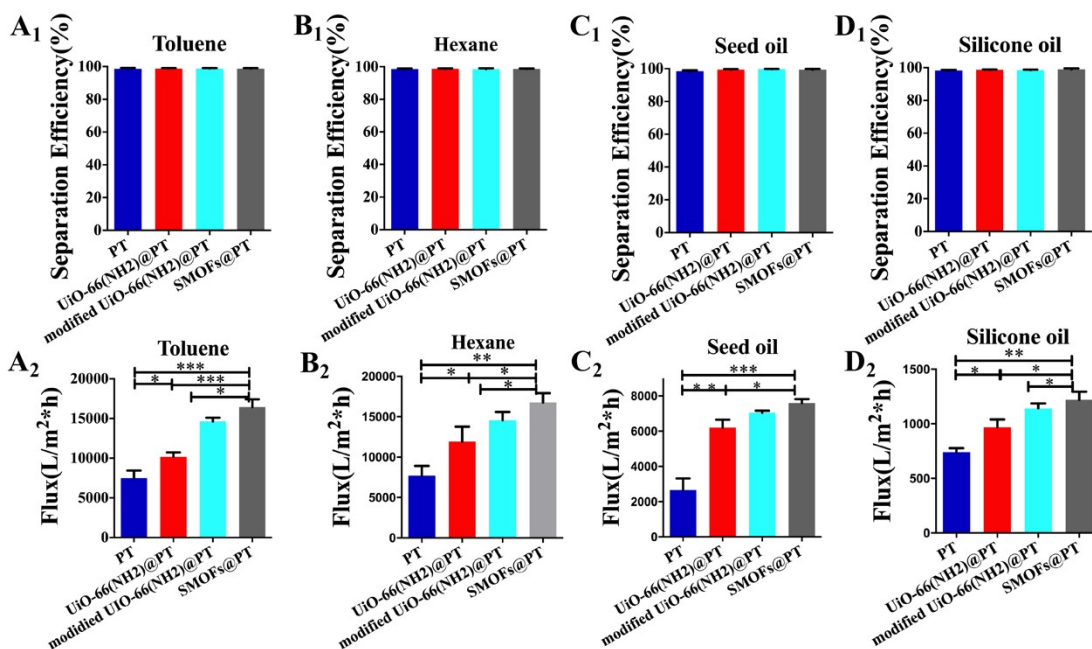

**Fig.S7.** Separation efficiency (A<sub>1</sub>-D<sub>1</sub>) and flux (A<sub>2</sub>-D<sub>2</sub>) of the composite electrospun membranes (PT, UiO-66(NH<sub>2</sub>)@PT, modified UiO-66(NH<sub>2</sub>)@PT and SMOFs@PT) in different kinds of oil-water mixture.

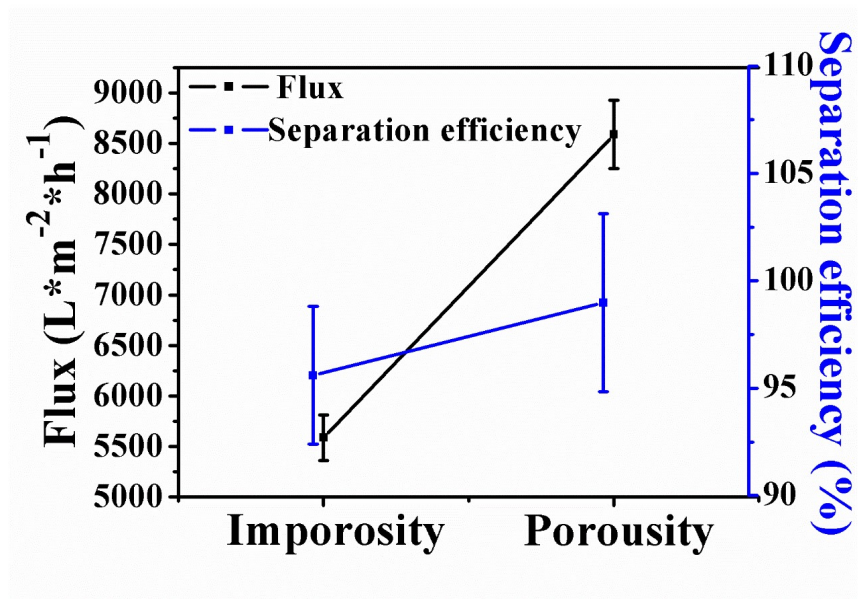

**Fig.S8.** The effect of porous fibers on separation efficiency and flux of the patterned electrospun membranes.

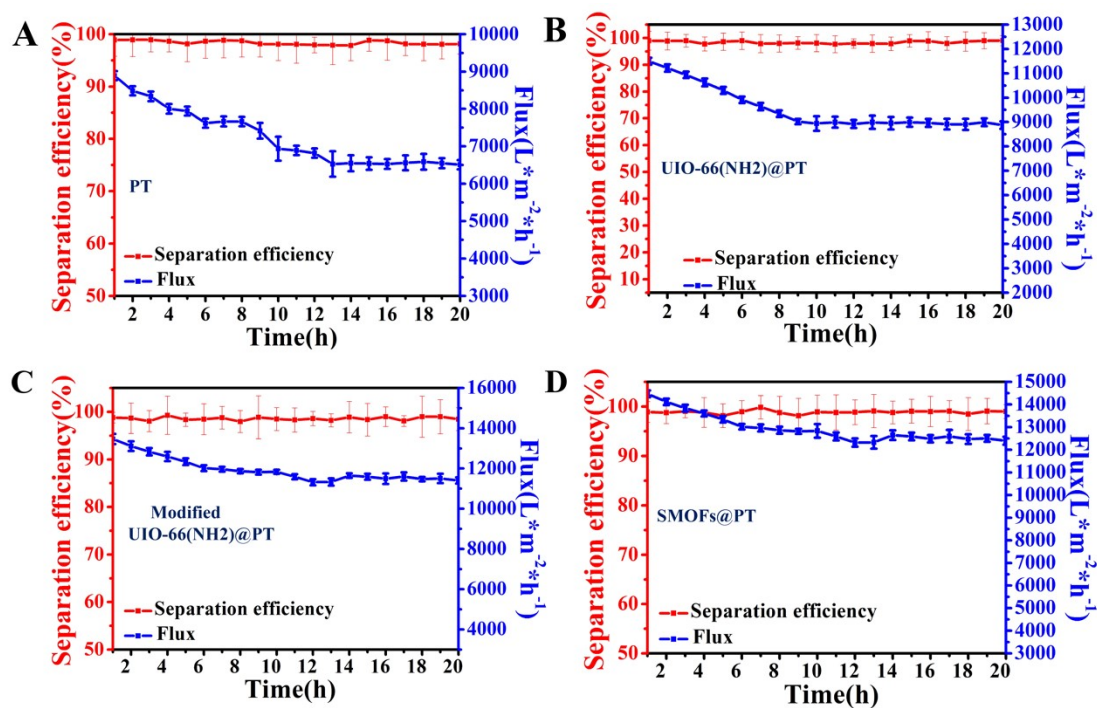

**Fig.S9.** The cycling experiment of the as-prepared membranes (PT, UiO-66(NH<sub>2</sub>)@PT, modified UiO-66(NH<sub>2</sub>)@PT and SMOF@PT) against filtration time for the separation of emulsified oily wastewater.

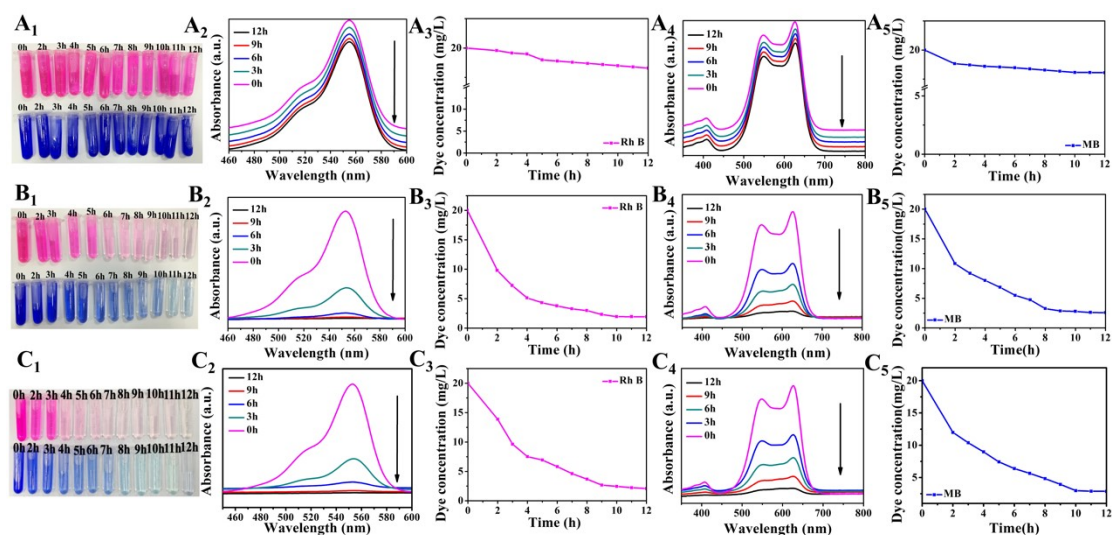

**Fig.S10.** The cationic dye adsorption behavior of the PT, UiO-66(NH<sub>2</sub>)@PT and modified UiO-66(NH<sub>2</sub>)@PT with the increase of time: (A<sub>1</sub>, B<sub>1</sub>, C<sub>1</sub>) Optical images of the color change of the filtrates. The UV-vis spectra collected each 3 h during the adsorption process of RhB (A<sub>2</sub>, B<sub>2</sub>, C<sub>2</sub>) and MB (A<sub>4</sub>, B<sub>4</sub>, C<sub>4</sub>). The statistical analysis of the RhB (A<sub>3</sub>, B<sub>3</sub>, C<sub>3</sub>) and MB (A<sub>5</sub>, B<sub>5</sub>, C<sub>5</sub>) residual concentration in the filtrates.

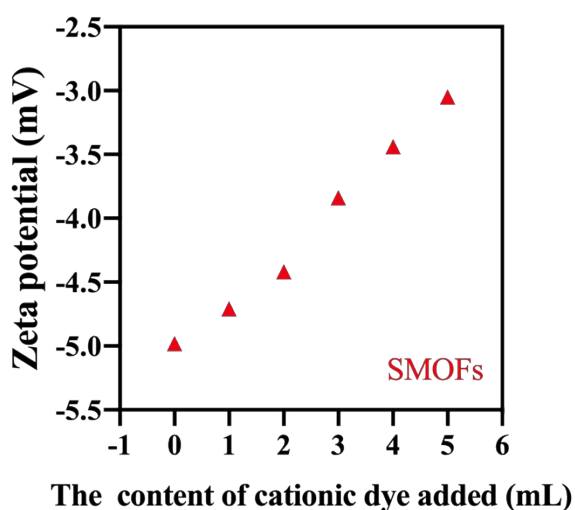

**Fig.S11.** The Zeta potential change of the SMOFs nanoparticles with the increase of the cationic dyes added.

**Table S1.** Comparison of the separation performance of emulsified oily wastewater by the membranes reported in the literatures and prepared in this work.

| Types | Materials<br>description | Operation<br>Method/ | Separation<br>efficiency | Flux<br>(L•m <sup>-2</sup> •h <sup>-1</sup> ) | Ref |
|-------|--------------------------|----------------------|--------------------------|-----------------------------------------------|-----|
|-------|--------------------------|----------------------|--------------------------|-----------------------------------------------|-----|

|                                                                    |                                                                                                                                                                                                    | Pressure            |         |          |      |
|--------------------------------------------------------------------|----------------------------------------------------------------------------------------------------------------------------------------------------------------------------------------------------|---------------------|---------|----------|------|
|                                                                    |                                                                                                                                                                                                    | (bar)               |         |          |      |
|                                                                    | PAN nanofibrous membrane with a biomimetic and sub-micrometer porous skin layer                                                                                                                    | Dead end / Gravity  | >99.93% | 312-5152 | [54] |
| polymeric electrospun membranes                                    | A nanofibrous composite membrane consisting of a nonwoven PAN nanofibrous supporting layer and a thin PVA hydrophilic barrier layer                                                                | Cross-flow/ 0.2 MPa | 99.6%   | 347.81   | [55] |
|                                                                    | A biomimetic nanofibrous membrane with BiOBr microspheres anchored on the SiO <sub>2</sub> /polyaniline (PANI) core-shell fibers.                                                                  | Dead end / Gravity  | —       | 6140     | [59] |
| Polymeric electrospun membranes modifying with inorganic particles | A PLA-based electrospun membrane with homogeneous dispersion of maghemite $\gamma$ -Fe <sub>2</sub> O <sub>3</sub> nanoparticles on the fiber surface and dual-scaled micro/nanopores in membrane. | Dead end/ Gravity   | —       | 2925     | [1]  |
|                                                                    | The surface of the PLA membranes was spinned with TiO <sub>2</sub> particles                                                                                                                       | Dead end / 1 MPa    | —       | 102      | [58] |
|                                                                    | The surface of the membranes was polymerized with F-PBZ functional layer that incorporated SiO <sub>2</sub> NPs.                                                                                   | Dead end / Gravity  | —       | —        | [79] |

|                                                             |                                                                                                                |                    |      |        |           |
|-------------------------------------------------------------|----------------------------------------------------------------------------------------------------------------|--------------------|------|--------|-----------|
|                                                             | A nanofibrous polyacrylonitrile membrane decorated with UiO-66(NH <sub>2</sub> ).                              | Dead end / Gravity | >99% | 2107   | [2]       |
|                                                             | The PAN membranes with ZIF-8 nanoparticles incorporated.                                                       | Dead end / Gravity | >99% | >900   | [7]       |
| Polymeric membranes modifying with metal organic frameworks | The MOFs was loaded on the surface of stainless steel mesh through PDA modification technology                 | Dead end / Gravity | —    | 350    | [47]      |
|                                                             | The membrane surface was decorated by UiO-66(NH <sub>2</sub> )                                                 | Dead end / 0.1 MPa | >86% | 2330   | [14]      |
|                                                             | The patterned membranes constructed with porous fibers, in which the superhydrophobic SMOFs were incorporated. | Dead end / Gravity | >99% | >15000 | This work |
